# Supplementary material
Source: publisher figshare collection journal article supplement (https://aacr.figshare.com/articles/dataset/_/23145133)
Supplement: Supplementary file 1 [file 40851430]

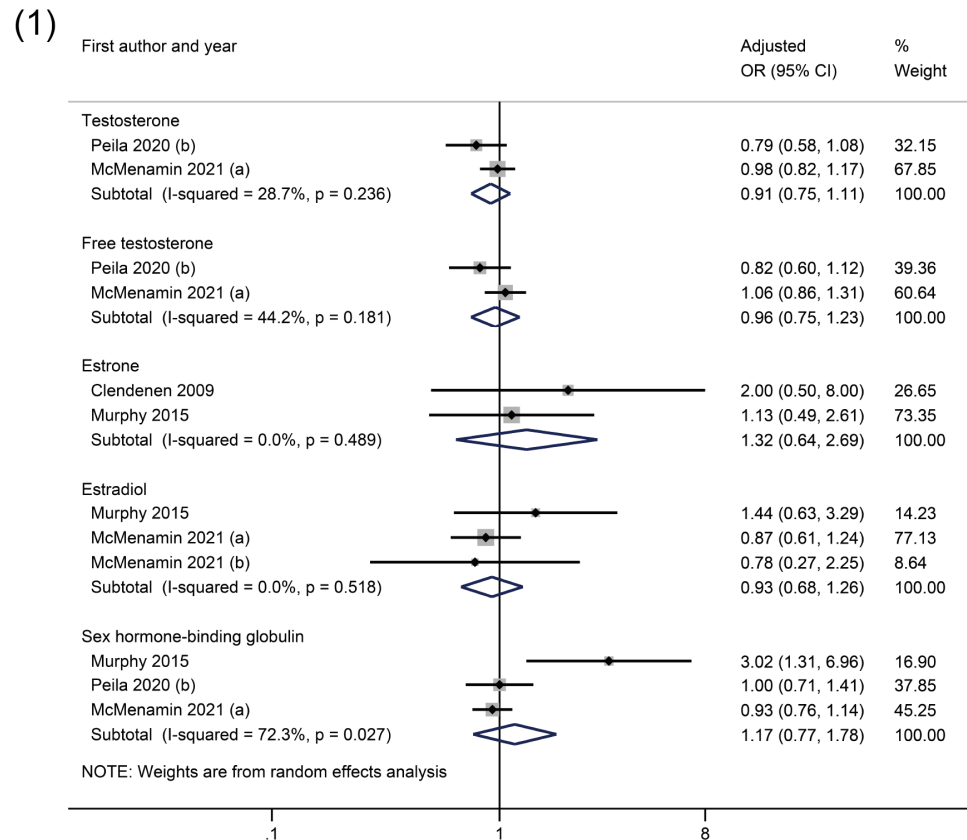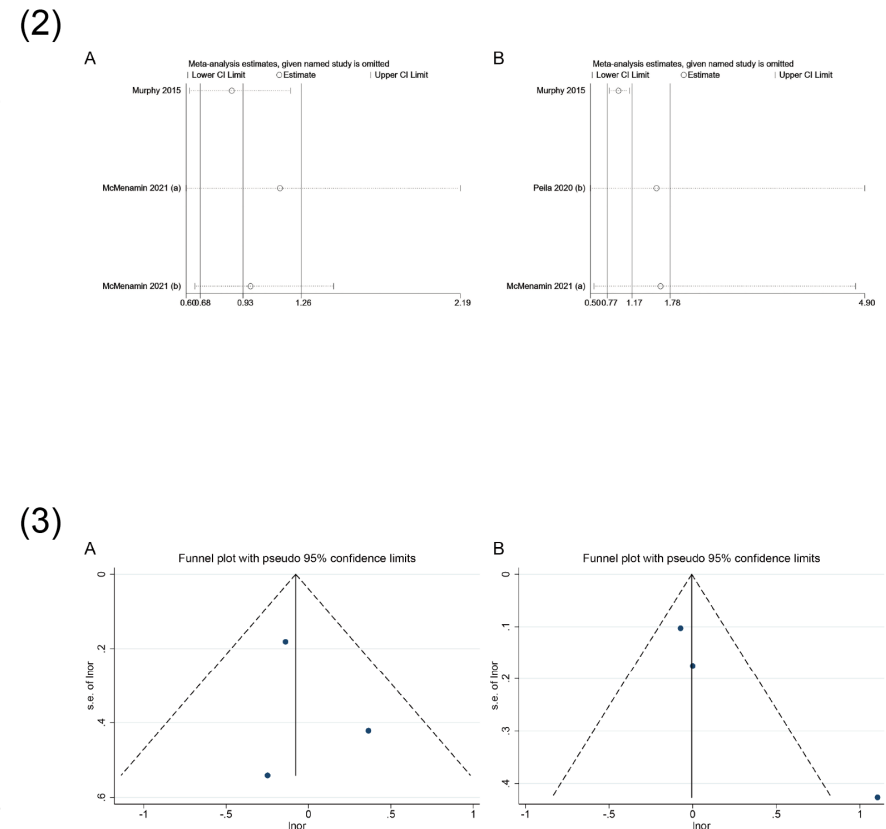

**Supplementary Figure S7. Forest plots (1), sensitivity analysis (2) and funnel plots (3) of the associations between prediagnostic circulating sex hormone levels and rectal cancer risk. (a) male; (b) female. (A) estradiol; (B) sex hormone-binding globulin.**
